# Supplementary material
Source: ML conference proceedings conference paper supplement (https://openreview.net/forum?id=4ULtNYHc5T)
Supplement: supplementary_material [file Appendix.pdf › Appendix.pdf]

---

# Appendix for “Exploring Tradeoffs through Mode Connectivity for Multi-Task Learning”

---

Anonymous Author(s)

Affiliation

Address

email

|    |                                                |          |
|----|------------------------------------------------|----------|
| 1  | <b>Contents</b>                                |          |
| 2  | <b>A Implementation Details</b>                | <b>2</b> |
| 3  | A.1 Evaluation Protocol . . . . .              | 2        |
| 4  | A.2 Experimental Setting . . . . .             | 2        |
| 5  | <b>B Additional Experiments</b>                | <b>2</b> |
| 6  | B.1 Ablation Study . . . . .                   | 2        |
| 7  | B.2 Grouping Strategy Comparison . . . . .     | 2        |
| 8  | B.3 Memory Cost Analysis . . . . .             | 3        |
| 9  | B.4 Plug-and-Play Verification . . . . .       | 3        |
| 10 | B.5 Analysis on Control Point Number . . . . . | 3        |
| 11 | B.6 Hyper-parameter Analysis . . . . .         | 4        |
| 12 | <b>C Limitation and Discussion</b>             | <b>5</b> |

## 13 A Implementation Details

### 14 A.1 Evaluation Protocol

15 For scene understanding benchmarks such as CityScapes and NYUv2, mainstream multi-task learning  
16 (MTL) approaches typically report the final performance by averaging results over the last 10 epochs,  
17 due to the absence of a validation set. However, this evaluation protocol is not directly applicable to  
18 our method, which generates a solution curve during training and evaluates sampled points along the  
19 curve to demonstrate superior trade-offs. Specifically, we save the trained model at the final epoch  
20 and evaluate MTL performance at  $t = \frac{1}{2}$ , which represents the midpoint of the curve.

21 For image classification benchmarks such as CelebA, we adopt the same training procedure as used  
22 for the scene understanding benchmarks. However, we utilize a validation set to select the optimal  
23 value of  $t$  and report the corresponding MTL performance.

### 24 A.2 Experimental Setting

25 In line with the implementation and training strategy of FairGrad [Ban and Ji, 2024], we construct  
26 our model using SegNet [Badrinarayanan et al., 2017], with MTAN [Liu et al., 2019] employed as  
27 the backbone. The model is trained using the Adam optimizer for 200 epochs. The initial learning  
28 rate is set to  $1e-4$  and decayed by a factor of 2 after 100 epochs. The batch size is set to 2 for NYUv2  
29 and 8 for CityScapes. The control point numbers are 4 and 5 on CityScapes and NYUv2, respectively,  
30 with 2 and 3 trainable in the second stage.

31 For the CelebA dataset, we adopt a 9-layer convolutional neural network (CNN) as the backbone,  
32 with task-specific linear heads appended. The model is trained with the Adam optimizer for 15 epochs  
33 using an initial learning rate of  $3e-4$  and a batch size of 256. The control point number is 3, with 1  
34 trainable in the second stage.

35 Regarding the MultiMNIST dataset, we follow the protocol described in PaMaL [Dimitriadis et al.,  
36 2023]. Each MultiMNIST image is formed by sampling (with replacement) two MNIST digits  
37 ( $28 \times 28$ ), which are placed at the top-left and bottom-right of a  $36 \times 36$  grid. This composite image is  
38 then resized to  $28 \times 28$  pixels. The resulting dataset comprises 60,000 training, 10,000 validation, and  
39 10,000 test samples. The model uses a LeNet-style shared-bottom architecture: the encoder contains  
40 two convolutional layers with 10 and 20 channels (kernel size 5), each followed by max pooling and  
41 ReLU activation. The encoder outputs a 50-dimensional embedding. Each decoder consists of two  
42 fully connected layers, with the final output layer producing predictions over 10 classes. The model  
43 is trained using Adam with a learning rate of 0.001, no learning rate scheduler, a batch size of 256,  
44 and a total of 10 training epochs. The control point number is 3, with 1 trainable in the second stage.

## 45 B Additional Experiments

### 46 B.1 Ablation Study

47 Our system comprises multiple components, including the order-aware objective ( $\mathcal{R}_o$ ), alignment  
48 objective ( $\mathcal{L}_{\text{align}}$  in Eqn.7), and curve selection. To evaluate the effectiveness and rationale behind  
49 each component, we conduct an ablation study on the NYUv2 dataset, with the results presented in  
50 Table 1. As shown, without  $\mathcal{L}_{\text{ast}}$ , EXTRA still outperforms the baseline but falls short of the complete  
51 system’s performance. This suggests that, while the model can minimize loss, it fails to properly  
52 calibrate the remaining tasks at  $t = \frac{1}{2}$ . Additionally, EXTRA shows slight improvements without  $\mathcal{L}_o$ ,  
53 demonstrating the strong capability of NURBS in capturing diverse trade-offs. This observation is  
54 further corroborated by the comparison between NURBS and Bézier, which reveals a substantial  
55 performance gap in MTL.

### 56 B.2 Grouping Strategy Comparison

57 To further demonstrate the effectiveness of the proposed grouping strategy, we compare it with two  
58 alternative approaches: random grouping and K-means clustering. The corresponding results are  
59 shown in Figure 1. In this experiment, the 40 tasks are grouped into 3 clusters using each of the  
60 three strategies, followed by multi-task learning (MTL) training. As illustrated, our strategy achieves

Table 1: Ablation study of EXTRA on NYUv2 (3 tasks).

| $\mathcal{L}_o$ | $\mathcal{L}_{align}$ | Bézier | NURBS | $\Delta m\% \downarrow$ |
|-----------------|-----------------------|--------|-------|-------------------------|
|                 |                       |        |       | -4.66                   |
| ✓               |                       |        | ✓     | -6.05                   |
|                 | ✓                     |        | ✓     | -4.97                   |
| ✓               | ✓                     | ✓      |       | -4.36                   |
| ✓               | ✓                     |        | ✓     | -6.30                   |

the best overall MTL performance, outperforming both random and K-means grouping. Notably, K-means clustering fails to deliver satisfactory results due to imbalanced cluster sizes. Specifically, we observe that two of the three K-means clusters contain only a single task, which hinders the exploration of trade-offs under our training framework.

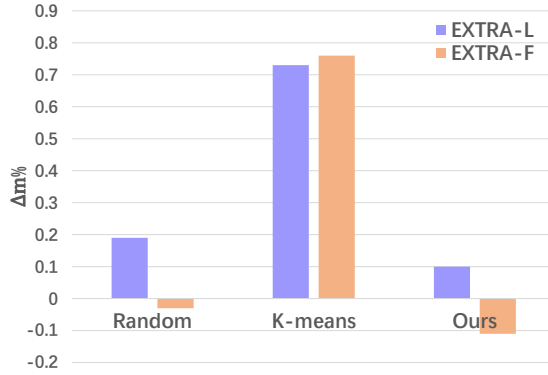

Figure 1: Comparison of grouping strategies on CelebA. ‘Random’ represents the uniform division for 40 tasks, while K-means represents leveraging K-means to cluster the warmup gradients of 40 tasks.

### B.3 Memory Cost Analysis

To evaluate the efficiency and scalability of our method compared to endpoint-based approaches, we statistically analyze their memory consumption during training across various MTL benchmarks, as shown in Figure 2. As depicted, in the 2-task (CityScapes) and 3-task (NYUv2) settings, EXTRA incurs slightly higher memory usage due to its two-stage training paradigm. However, in the large-scale scenario with 40 tasks (CelebA), endpoint-based methods such as PaMaL require substantial memory resources, resulting in an out-of-memory (OOM) issue during training. In contrast, EXTRA maintains a manageable memory footprint, demonstrating better scalability.

### B.4 Plug-and-Play Verification

In addition to LS and FairGrad, we further incorporate another mainstream MTL approach, CAGrad, to demonstrate the plug-and-play capability of EXTRA, with the corresponding results shown in Table 2. As illustrated, EXTRA also provides significant improvements when applied to CAGrad, following the same trend observed with LS and FairGrad. Specifically, EXTRA not only enhances overall MTL performance but also improves each individual metric, thereby verifying its plug-and-play effectiveness.

### B.5 Analysis on Control Point Number

We further analyze the effect of the number of bends in the NURBS representation on the CityScapes dataset, with results presented in Figure 4. As shown, EXTRA-L achieves the best performance in terms of  $\Delta m\%$  when the number of bends is set to 4. Notably, reducing the number of bends to 3 leads to a substantial drop in performance, likely due to the limited expressive capacity of the

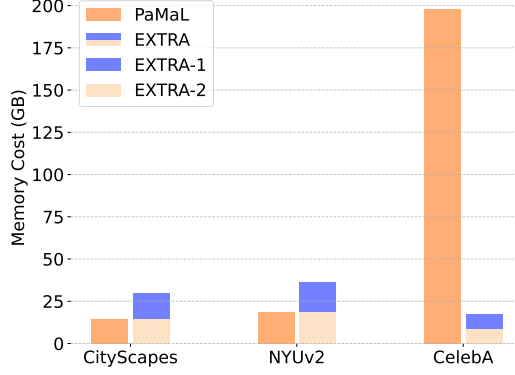

Figure 2: Memory Cost Comparison. ‘EXTRA-1’ and ‘EXTRA-2’ represents the first and second training stage of EXTRA. Note that the memory consumption of PaMaL on the CelebA dataset is estimated, as its actual training raises an out-of-memory (OOM) issue under our experimental settings.

Table 2: **Scene understanding** (*CityScapes*, 2 tasks).  $\blacktriangle/\blacktriangledown$  indicates outperforms/underperforms their vanilla versions. ‘EXTRA-L’, ‘EXTRA-C’, and ‘EXTRA-F’ are EXTRA augmented LS, CAGrad, and FairGrad versions.

| Method      | Segmentation $\uparrow$ |                            | Depth $\downarrow$      |                        | $\Delta m\%$ $\downarrow$ |
|-------------|-------------------------|----------------------------|-------------------------|------------------------|---------------------------|
|             | mIoU                    | Pix. Acc.                  | Abs. Err.               | Rel. Err.              |                           |
| Independent | 74.01                   | 93.16                      | 0.0125                  | 27.77                  | -                         |
| LS          | 75.18                   | 93.49                      | 0.0155                  | 46.77                  | 22.60                     |
| EXTRA-L     | 75.53 $\blacktriangle$  | 93.63 $\blacktriangle$     | 0.0127 $\blacktriangle$ | 33.45 $\blacktriangle$ | 4.93 $\blacktriangle$     |
| CAGrad      | 75.16                   | 93.48                      | 0.0141                  | 37.60                  | 11.58                     |
| EXTRA-C     | 75.50 $\blacktriangle$  | 93.55 $\blacktriangle$     | 0.0135 $\blacktriangle$ | 35.73 $\blacktriangle$ | 8.61 $\blacktriangle$     |
| FairGrad    | 75.72                   | 93.68                      | 0.0134                  | 32.25                  | 5.18                      |
| EXTRA-F     | 76.11 $\blacktriangle$  | 93.58 $\blacktriangledown$ | 0.0126 $\blacktriangle$ | 30.20 $\blacktriangle$ | 1.63 $\blacktriangle$     |

85 NURBS curve. Conversely, increasing the number of bends to 5 or 6 does not yield performance  
86 gains, which is somewhat counterintuitive. To investigate this further, we visualize the corresponding  
87 loss landscapes in Figure 3. As illustrated, EXTRA-3 degenerates into a Bézier-like curve, exhibiting  
88 excessive smoothness. Meanwhile, the curves produced by EXTRA-5 and EXTRA-6 appear irregular  
89 and less stable, likely due to the increased difficulty in optimization, which in turns highlights the  
superiority of choosing curve-based rather than endpoint-based mode connectivity for MTL.

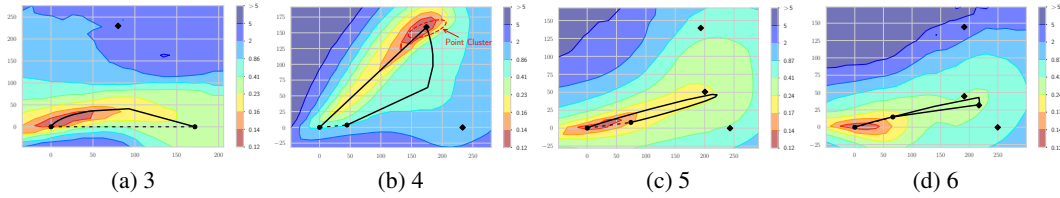

Figure 3: The loss landscape of employing NURBS with different control point number (including endpoints). We abbreviate them as EXTRA-3, EXTRA-4, EXTRA-5, and EXTRA-6.

90

## 91 B.6 Hyper-parameter Analysis

92 We evaluate the impact of the hyperparameter  $\alpha$  on the final performance and present the results  
93 in Figure 5. As shown, the performance remains relatively stable across different values of  $\alpha$ , with  
94 the highest average performance achieved at  $\alpha = 0.3$ . However,  $\alpha = 0.5$  offers a better trade-off  
95 between average performance and variance. Therefore, we adopt  $\alpha = 0.5$  as the default setting in our  
96 experiments.

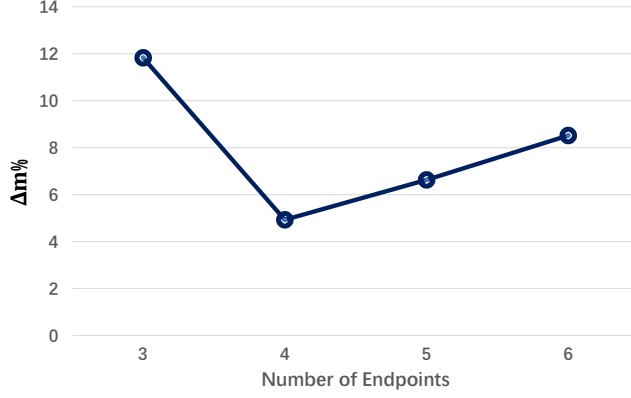

Figure 4: Analysis of number of bends on *CityScapes*, 2 tasks.

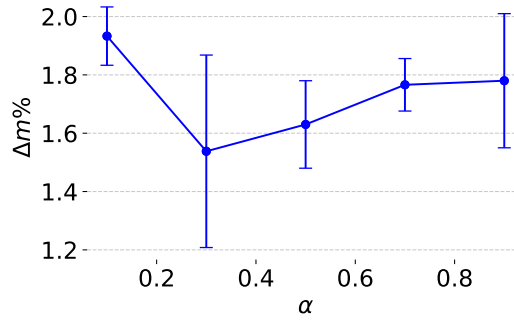

Figure 5: Analysis on  $\alpha$ .

## 97 C Limitation and Discussion

98 Although EXTRA achieves state-of-the-art performance on mainstream MTL benchmarks, it faces  
 99 challenges in delivering user-preference MTL results when the number of tasks exceeds two. While  
 100 a Bézier surface can align mode connectivity with the Pareto front for three tasks, this approach  
 101 becomes progressively more difficult as the number of tasks increases, which represents a key  
 102 limitation of our method. Addressing this limitation will be a focal point of future work. Additionally,  
 103 one might raise concerns regarding the fairness of our evaluation, given that EXTRA utilizes multiple  
 104 points (endpoints and control points) to construct the curve, thereby increasing the model’s capacity.  
 105 While we acknowledge this concern, we emphasize that our work introduces a novel perspective  
 106 to MTL, potentially offering an alternative to gradient-based MTL approaches, which have been  
 107 debated for their effectiveness [Xin et al., 2022].

## 108 References

- 109 Vijay Badrinarayanan, Alex Kendall, and Roberto Cipolla. Segnet: A deep convolutional encoder-  
 110 decoder architecture for image segmentation. *IEEE transactions on pattern analysis and machine*  
 111 *intelligence*, 39(12):2481–2495, 2017.
- 112 Hao Ban and Kaiyi Ji. Fair resource allocation in multi-task learning. *arXiv preprint*  
 113 *arXiv:2402.15638*, 2024.
- 114 Nikolaos Dimitriadis, Pascal Frossard, and François Fleuret. Pareto manifold learning: Tackling  
 115 multiple tasks via ensembles of single-task models. In *International Conference on Machine*  
 116 *Learning*, pages 8015–8052. PMLR, 2023.
- 117 Shikun Liu, Edward Johns, and Andrew J Davison. End-to-end multi-task learning with attention.  
 118 In *Proceedings of the IEEE/CVF conference on computer vision and pattern recognition*, pages  
 119 1871–1880, 2019.

120 Derrick Xin, Behrooz Ghorbani, Justin Gilmer, Ankush Garg, and Orhan Firat. Do current multi-task  
121 optimization methods in deep learning even help? *Advances in neural information processing*  
122 *systems*, 35:13597–13609, 2022.
